# **$\alpha$ -Synuclein-induced Kv4 channelopathy in mouse vagal motoneurons causes non-motor parkinsonian symptoms**

Wei-Hua Chiu<sup>1</sup>, Lora Kovacheva<sup>2</sup>, Ruth E. Musgrove<sup>1#</sup>, Hadar Arien-Zakay<sup>3</sup>, James B. Koprich<sup>4</sup>, Jonathan M. Brotchie<sup>4</sup>, Rami Yaka<sup>3</sup>, Danny Ben-Zvi<sup>5</sup>, Menachem Hanani<sup>6</sup>, Jochen Roeper<sup>2</sup>, Joshua A. Goldberg<sup>1\*</sup>

<sup>1</sup>Department of Medical Neurobiology, Institute of Medical Research Israel – Canada, The Faculty of Medicine, The Hebrew University of Jerusalem, 9112102 Jerusalem, Israel

<sup>2</sup>Institute of Neurophysiology, Neuroscience Center, Goethe-University, 60590 Frankfurt, Germany

<sup>3</sup>School of Pharmacy, Institute for Drug Research, The Faculty of Medicine, The Hebrew University of Jerusalem, 9112102 Jerusalem, Israel

<sup>4</sup>Krembil Research Institute, Toronto Western Hospital, University Health Network, Toronto, ON, M5T 2S8, Canada

<sup>5</sup>Department of Developmental Biology and Cancer Research, Institute of Medical Research Israel – Canada, The Faculty of Medicine, The Hebrew University of Jerusalem, 9112102 Jerusalem, Israel

<sup>6</sup>Laboratory of Experimental Surgery, Hadassah Medical Center, Mount Scopus, 91240 Jerusalem & The Faculty of Medicine, The Hebrew University of Jerusalem

\*Lead and Corresponding author

#Current Address: Menzies Institute for Medical Research, The University of Tasmania, Hobart, 7000, Australia

## **Summary**

No disease modifying therapy is currently available for Parkinson's disease (PD), the second most common neurodegenerative disease. The long non-motor prodromal phase of PD is a window of opportunity for early detection and intervention. However, we lack the pathophysiological understanding to develop selective biomarkers and interventions. By developing a mutant  $\alpha$ -synuclein selective-overexpression mouse model of prodromal PD, we identified a cell-autonomous selective Kv4 channelopathy in dorsal motor nucleus of the vagus (DMV) neurons. This functional remodeling of intact DMV neurons leads to impaired pacemaker function *in vitro* and *in vivo*, which in turn reduces gastrointestinal motility and alters cardiac function – both clinically relevant symptoms of prodromal PD. We show for the first time a causal chain of events from  $\alpha$ -synuclein via a biophysical dysfunction of specific neuronal populations to clinically relevant prodromal symptoms. These findings can facilitate the rational design of clinical biomarkers to identify people at risk for PD.

## **Keywords**

Prodrome; A53T SNCA; pathophysiology; brain stem; dysautonomia; DREADDs; juxtacellular labeling; excitability; homeostasis

## Introduction

$\alpha$ -Synuclein is an established causal driver of PD: multiplications or point mutations in the *SNCA* gene lead to familial forms of PD (Farrer et al., 1998; Polymeropoulos et al., 1997); single nucleotide polymorphisms near its locus increase the risk for idiopathic PD (Simón-Sánchez et al., 2009); and  $\alpha$ -synuclein aggregates are a main constituent of the Lewy pathologies (LPs) that are a hallmark of PD and other synucleinopathies (Spillantini et al., 1998). These discoveries have driven extensive research into developing therapies aimed at either silencing the *SNCA* gene, reducing  $\alpha$ -synuclein production, preventing  $\alpha$ -synuclein aggregation, promoting degradation of intracellular and extracellular  $\alpha$ -synuclein or preventing its propagation to other cells (Brundin et al., 2017; Lang and Espay, 2018). However, the lessons from Alzheimer's disease clinical trials targeting beta-amyloids with similar strategies (Selkoe, 2019) indicated that early detection before manifestation of clinical core symptom might also be essential for PD (Brundin et al., 2017; Lang and Espay, 2018). Therefore, for future disease-modifying therapies to be successful they will require early detection of the  $\alpha$ -synucleinopathies, which in most (but not all) cases appear in the brainstem years before clinical diagnosis (Arnaldi et al., 2019; Lim et al., 2009; Mahlknecht et al., 2016; Postuma and Berg, 2019). During this prodromal period, future PD patients already begin to suffer from a variety of non-motor symptoms (NMS), which can precede clinical diagnosis by decades (Postuma and Berg, 2019). It stands to reason that particular NMS are associated with the appearance of LPs in particular anatomical regions. For example, constipation and dysautonomia (Goldstein, 2003; Knudsen et al., 2018; De Pablo-Fernández et al., 2019) are likely related to the appearance (in Braak stage I) (Braak et al., 2003) of misfolded  $\alpha$ -synuclein in the medullary dorsal motor nucleus of the vagus (DMV) that innervates the gastrointestinal (GI) tract (Bonaz et al., 2016). However, it is unknown whether dysautonomia is caused simply by DMV cell loss, or driven by LP-induced functional changes in surviving DMV neurons. This difference has important implications, as PD-selective DMV pathophysiology is likely to facilitate early detection compared to more generic phenotypes caused by cell loss and neuroinflammation. In the present study, we test this hypothesis by generating an adult onset mouse model of a selective medullary  $\alpha$ -synucleinopathy. We use this model to identify an  $\alpha$ -synuclein-induced channelopathy in DMV neurons that causes prodromal dysautonomia.

## Results

### Selective induction of $\alpha$ -synucleinopathy in vagal motoneurons of adult mice reduces vagal output and gastrointestinal motility

To determine whether  $\alpha$ -synucleinopathy restricted to the medulla reproduces dysautonomia characteristic of prodromal PD, we injected adeno-associated viruses (AAVs) harboring either the mutated human *A53T-SNCA* gene (AAV-A53T) or an empty vector (AAV-EV) into the right cervical vagus nerve of C57BL/6JRccHsd mice (Fig. 1A). Six weeks later, the A53T  $\alpha$ -synuclein transgene product was observed bilaterally within afferent sensory fibers of the medullary nucleus of the solitary tract (NST) and area postrema (Fig. 1B) as well as within ipsilateral cholinergic motoneurons of the DMV (Fig. 1B,C). Unbiased

stereological analysis at this timepoint demonstrated that AAV injections *per se* – whether  $\alpha$ -synuclein-expressing or empty vectors – induced mild cell loss with a median of approximately 20% – presumably due to mechanical damage to the vagus nerve fibers (Supplementary Fig. 1). Thus, DMV cell loss alone cannot explain divergent phenotypes in this mouse model.

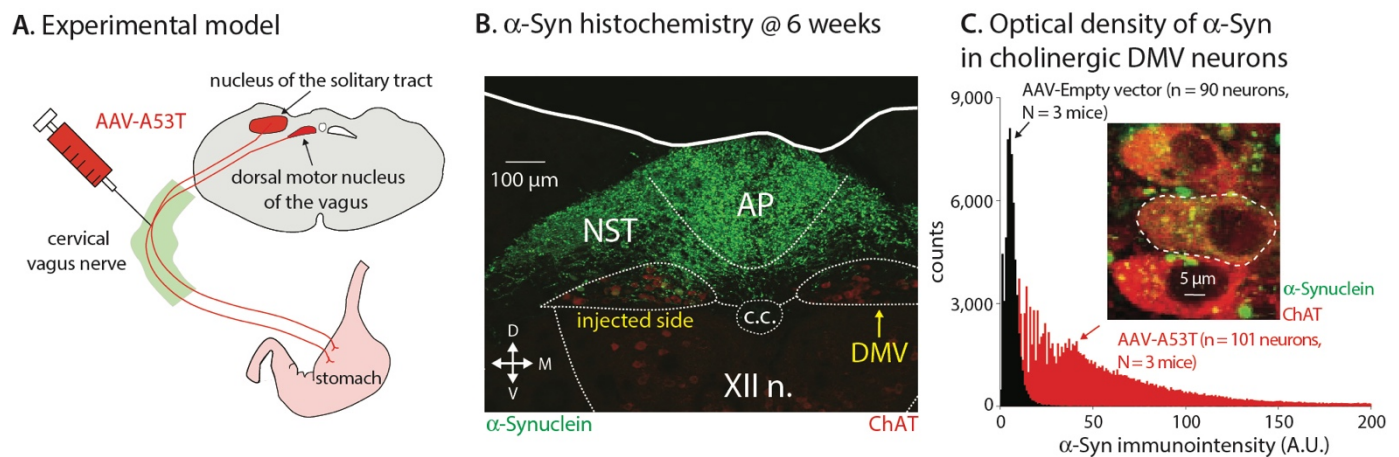

**Figure 1. Model of adult onset  $\alpha$ -synucleinopathy in the mouse dorsal medulla.** (A) Injection of adeno-associated viruses (AAVs) harboring the mutated human *A53T-SNCA* gene into the cervical vagus causes the transfection of the dorsal motor nucleus of the vagus (DMV) and other regions such as the nucleus of the solitary tract (NST). (B) Six weeks post injection,  $\alpha$ -synuclein (green) is visible in the area postrema (AP), in the NST and in the DMV, where immunohistochemical staining for choline acetyltransferase (ChAT) can be seen (red). XII n. – hypoglossal nucleus; c.c. – central canal. (C) Optical density measurements of the intensity of human  $\alpha$ -synuclein fluorescent immunolabeling (green in inset) within regions-of-interest (dotted white line in inset) marked around the somata of ChAT-expressing neurons (red in inset) reveals a rightward shift in the distribution of immunointensity values from AAV-A53T-transfected relative to AAV-Empty Vector (AAV-EV)-transfected vagal motoneurons.

Six weeks after bilateral injection of the cervical vagus nerves, the AAV-A53T-injected mice produced larger stool than the AAV-EV injected mice (Supplementary Fig. 2), which is suggestive of slowed GI motility. Direct measurements of time of passage confirmed a slowing of GI motility at 6, but not 3, weeks after transfection (Fig. 2A). Using excised segments of the ileum in an organ bath, we ruled out that the slowed motility was due to a direct intestinal action of  $\alpha$ -synuclein, despite its expression in vagal terminals (data not shown) (Ulusoy et al., 2017). We found that neither the responses of the ileal muscle to the muscarinic cholinergic agonist pilocarpine, nor the frequency and amplitude of spontaneous contractions were altered by  $\alpha$ -synuclein (Fig. 3). Similarly, responses of the ileal muscle to electric field stimulation (EFS) of the nerves were not altered (data not shown). Thus, because GI tract smooth muscles, pacemakers and nerves were intact in AAV-A53T treated mice, we hypothesized that the expression of mutant  $\alpha$ -synuclein in the DMV reduced GI motility by inhibiting the electrical activity of DMV motoneurons, which normally augment GI motility (Bonaz et al., 2016). Indeed, selective chemogenetic inhibition of cholinergic DMV motoneurons – by transfecting them selectively and unilaterally with AAVs harboring the inhibitory Designer Receptor Exclusively Activated by Designer Drugs (DREADDs) hM4Di – was sufficient to recapitulate the slowed motility induced by AAV-A53T when the mice were intraperitoneally injected with the DREADD agonist clozapine-*N*-oxide (CNO), but not with vehicle (Fig. 2B).

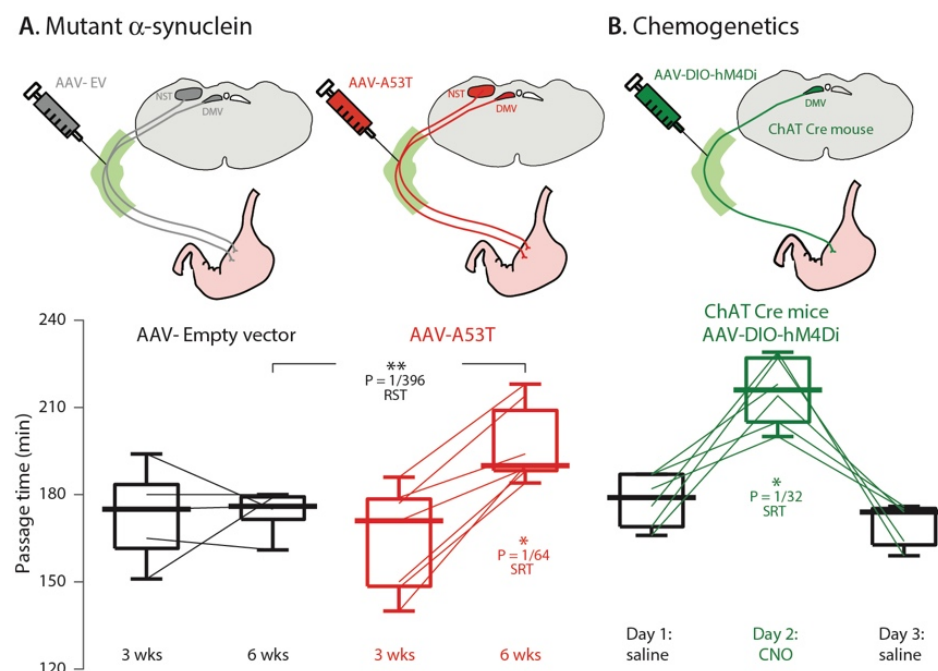

**Figure 2. Gastrointestinal motility is slowed in the mouse model of medullary  $\alpha$ -synucleinopathy. (A)** Animals transfected with AAV-A53T but not with AAV-EV exhibited slowed GI motility at 6, but not 3, weeks after transfection. **(B)** Injection of AAVs harboring Cre-dependent hM4Di DREADDs into the cervical vagus of ChAT-Cre mice leads to selective transfection of cholinergic motoneurons in the DMV. Intraperitoneal injection of the DREADDD ligand, clozapine-*N*-oxide (CNO), but not vehicle (saline) slows motility, indicating that silencing these neurons suffices to recapitulate the effect of AAV-A53T transfection. RST – two-tailed Wilcoxon Rank-Sum test; SRT – two-tailed Wilcoxon Signed-Rank test.

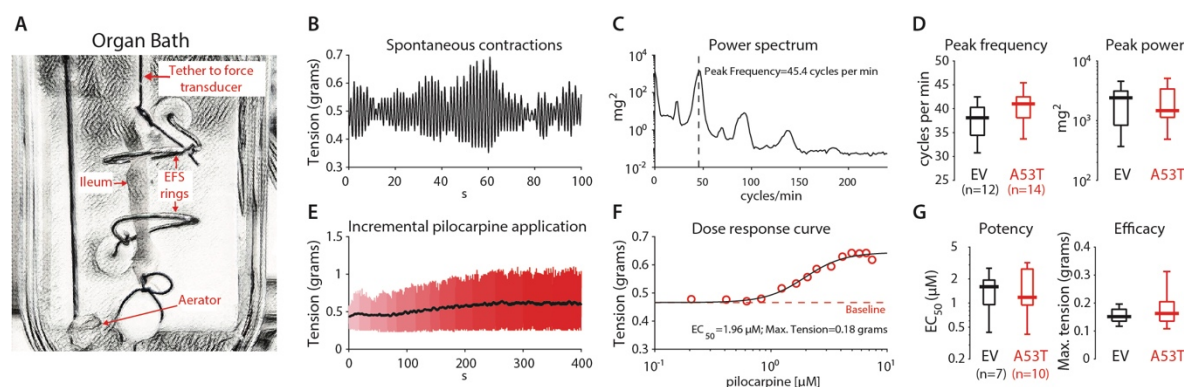

**Figure 3. Intrinsic motility and susceptibility to muscarinic stimulation of excised ileal segments in an organ bath after induction of adult onset medullary  $\alpha$ -synucleinopathy. (A)** Organ bath used for the excised ileum preparation. Short segment of ileum is immersed into warm (37°C), oxygenated Krebs solution, while tethered to a force transducer, and surrounded by two ring electrodes for electric field stimulation (EFS). **(B)** Tension as a function of time, reveals spontaneous polymorphic oscillations in the excised segment. **(C)** Power spectrum of the spontaneous contractions reveals multiple spectral peaks. **(D)** Peak frequency of oscillations (extracted from the fundamental mode of the power spectrum) and amplitude of oscillations in the mice transfected with AAV-A53T or AAV-EV is similar. **(E)** Tension as a function of time during incremental increases in bath concentration of the muscarinic agonist, pilocarpine. **(F)** Dose response curve of pilocarpine extracted from panel E. **(G)** The potency (EC<sub>50</sub>) or efficacy of the direct effect of pilocarpine on ileal muscle in the mice transfected with AAV-A53T or AAV-EV is similar.



To determine whether vagal motoneuron firing rates were indeed slower in the AAV-A53T injected mice, we performed *in vivo* single-unit extracellular recording of DMV neurons under isoflurane anesthesia (Jones et al., 1998; Zhang et al., 1992). Using juxtacellular labeling combined with immunohistochemistry (Fig. 4A), 65% (17/26) of the recorded cells were positively identified as cholinergic DMV neurons (Fig. 4B), with the remainder being identified within the DMV via electrolytic lesions. The median firing rate of vagal motoneurons transfected with AAV-A53T was 60% slower than those transfected with AAV-EV. This reduction in firing rate was selective to vagal motoneurons, as neurons in the neighboring NST, where mutant  $\alpha$ -synuclein was also expressed (Fig. 1B), discharged at control rates (Fig. 4C).

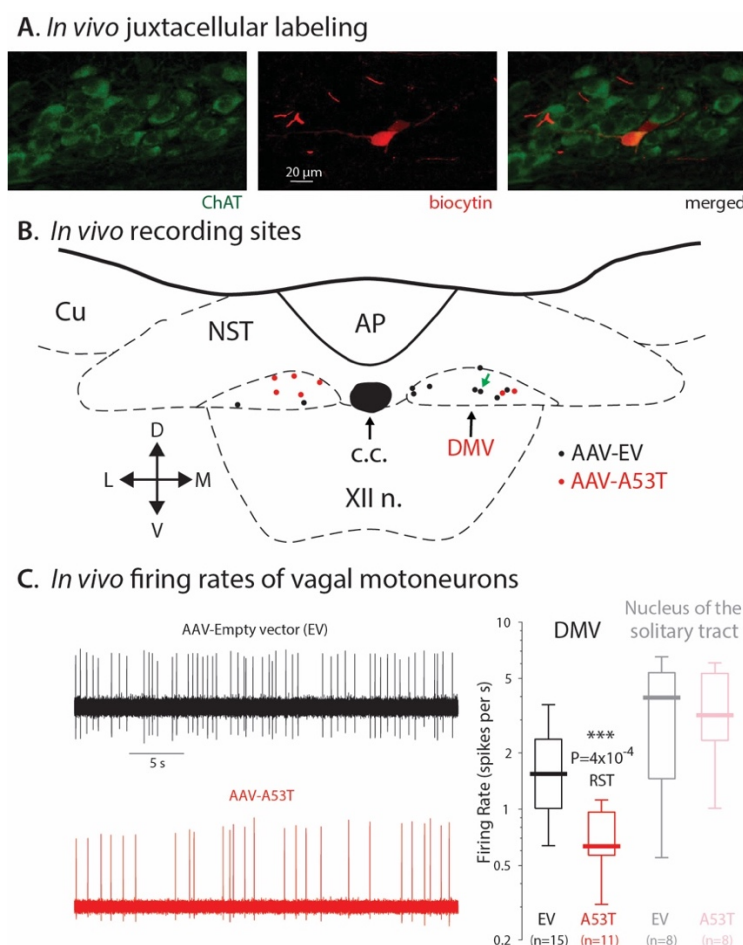

**Figure 4. *In vivo* extracellular recording and juxtacellular labeling of cholinergic DMV neurons in the mouse model of medullary  $\alpha$ -synucleinopathy.** (A) Left: a ChAT-expressing (green) DMV neurons. Middle: juxtacellularly labeled DMV neuron (red) after *in vivo* extracellular recording from an anesthetized mouse injected with AAV-A53T. Right: Merge of both images. (B) Map of recording sites of juxtacellularly labeled neurons (black and red dots correspond to AAV-EV and AAV-A53T transfected neurons, respectively). Green arrow indicates location of neuron from panel A. Abbreviations: AP – area postrema; c.c. – central canal; Cu – cuneate nucleus; DMV – dorsal motor nucleus of the vagus; NST – nucleus of the solitary tract; XII n. – hypoglossal nucleus. (C) Left: examples of extracellular recordings from mice injected with an AAV-EV (black) or with AAV-A53T (red). Right: box plot of firing rates demonstrates that AAV-A53T transfection leads to a reduction in the firing rates of DMV, but not NST, neurons. RST – two-tailed Wilcoxon Rank-Sum test.

### **$\alpha$ -Synucleinopathy in mouse vagal motoneurons slows their autonomous pacemaker frequency due to elevated surface density of functional Kv4 channels**

DMV motoneurons are autonomous pacemakers (Goldberg et al., 2012), meaning that they discharge independently of synaptic input due to their intrinsic pacemaker currents. Thus, the most parsimonious explanation for the reduced *in vivo* firing rates in the AAV-A53T injected mice is that their intrinsic pacemaker frequency is lowered. To test this, we

performed extracellular cell-attached recordings (to maintain metabolic integrity) of DMV motoneurons in acute medullary slices 6 weeks after AAV injection. We found that the autonomous firing rates were reduced in AAV-A53T-injected mice by 60%, relative to controls (Fig. 5A). The close agreement with the *in vivo* recordings (Fig. 4A) suggests that slowing of vagal motoneuron discharge in the intact animal is due mainly to a cell-autonomous change in excitability (while not ruling out additional circuit adaptations). Furthermore, measurement of the frequency-current relationship (f-I curve) of vagal motoneurons in the whole-cell configuration demonstrated a rightward shift in comparison to controls (Fig. 5B). Thus, the excitability of DMV motoneurons transfected with  $\alpha$ -synuclein was reduced across the entire dynamic range of their input-output relationship. These findings demonstrate that the ability of either intrinsic or extrinsic currents to depolarize the membrane potential of DMV motoneurons is curtailed by some  $\alpha$ -synuclein-induced modification to their membrane biophysics (i.e., to an ionic current that underlies their slow autonomous pacemaking).

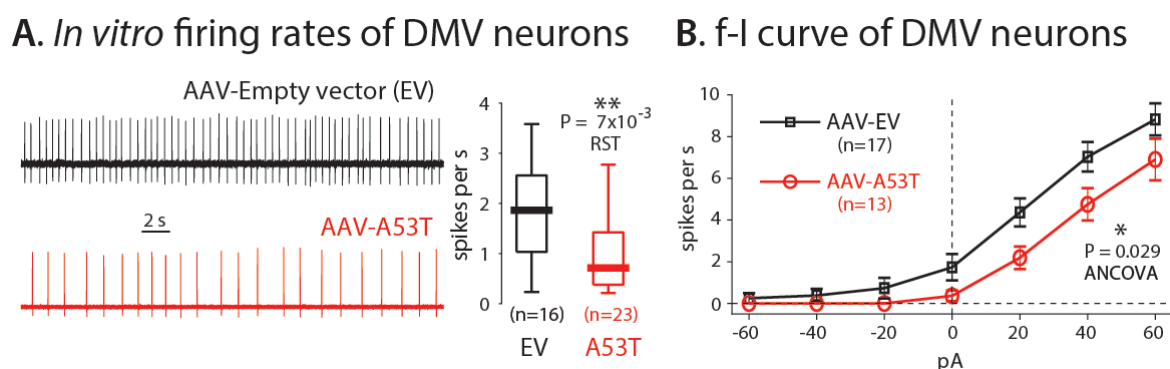

**Figure 5. Reduction of pacemaker frequency and intrinsic excitability of DMV neurons in the mouse model of medullary  $\alpha$ -synucleinopathy.** (A) Examples of cell-attached recordings of DMV neurons that were transfected with either AAV-EV (black) or AAV-A53T (red) in acute brain slices. Traces are the time-derivative of passive current clamp recordings. Right: box plot of firing rates demonstrates a slowing of the pacemaker frequency in DMV neurons transfected with AAV-A53T that is equivalent to the reduction observed *in vivo*. (B) Frequency-intensity (f-I) curves of DMV neurons transfected with AAV-A53T are right-shifted relative to control indicating reduced excitability. RST – two-tailed Wilcoxon Rank-Sum test.

The main ionic current determining the rate of membrane depolarization and the firing rate of DMV neurons is the A-type, fast inactivating voltage dependent  $K^+$  current carried by Kv4 channels (Cooper et al., 2015; Yarom et al., 1985). Functional Kv4 channels act like a brake on spontaneous subthreshold depolarizations and slow down pacemaker frequencies. Therefore, we compared the Kv4 current in DMV motoneurons treated with either AAV-A53T or AAV-EV (Fig. 6A). While the voltage dependencies and kinetics of the A-type current in DMV neurons did not differ between the AAV treatments (Fig. 6B), the surface density of the Kv4 current was significantly higher in mice injected with AAV-A53T (Fig. 6C), which – due to the constitutive Kv4 window current in the subthreshold range (Fig. 6B) – suffices to explain their reduced pacemaker frequency. Importantly, our data argue against an upregulation of functional Kv4 channels, because the total whole-cell Kv4 current did not differ between the AAV treatments (data not shown), pointing to an alternative mechanism.

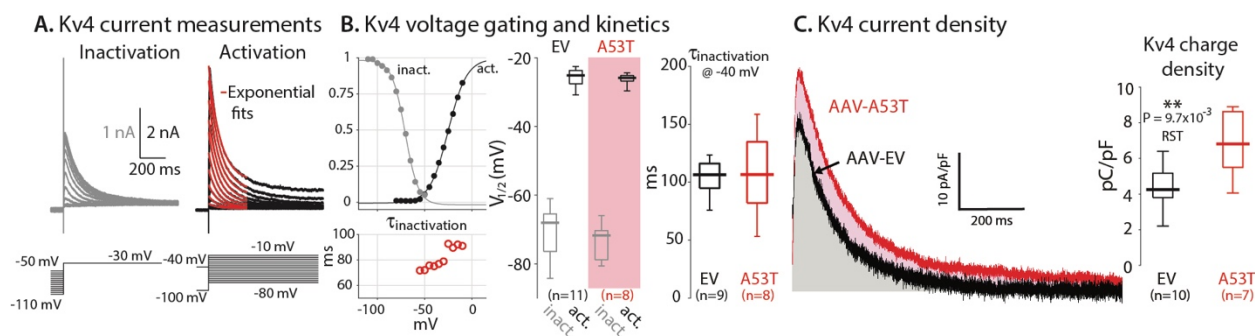

**Figure 6. Surface density of Kv4 currents is elevated without changes to their voltage gating and kinetics.**

(A) Voltage clamp measurements of A-type currents yield voltage activation and inactivation curves and time constants of inactivation. Note that a window current flows constitutively in the subthreshold voltage range where the voltage activation and inactivation curves overlap. (B) Comparison of voltage dependency of activation and inactivation and channel inactivation kinetics between AAV-EV and AAV-A53T transfected mice reveals no difference. (C) Left: example of measurements of the inactivating A-type current density (depolarization to -40 mV), that is carried by Kv4 channels, from DMV neurons transfected with either AAV-EV (black) or AAV-A53T (red). Areas under the curves in gray and pink, respectively, indicate the Kv4 charge densities, which are significantly higher in the DMV neurons transfected with AAV-A53T (box plots). RST – two-tailed Wilcoxon Rank-Sum test.

### **An $\alpha$ -synuclein-induced, cell-autonomous shrinkage of vagal motoneurons causes a selective dysregulation of Kv4 current densities**

$\alpha$ -Synuclein overexpression has been shown to cause vagal motoneurons (Ulusoy et al., 2015) and other neuronal types (Fang et al., 2017) to shrink. Indeed, measurement of the long axis of the somata of DMV neurons from animals transfected with AAV-A53T demonstrated that it was shorter in human  $\alpha$ -synuclein-positive DMV neurons in comparison to neighboring human  $\alpha$ -synuclein-negative DMV neurons (Fig. 7A). Note that human  $\alpha$ -synuclein-negative neurons in AAV-A53T transfected mice were not different in size compared to controls in the AAV-EV transfected mice (Fig. 7A). This indicates that shrinkage of cell size was due to a cell-autonomous process, and gave – at least at the timepoint of analysis - no evidence for the contribution of additional non-cell-autonomous conditions, such as neuroinflammation (Rusconi et al., 2018; Ulusoy et al., 2015). To better gauge the degree of reduction in surface area, we filled DMV neurons from both AAV-EV and AAV-A53T transfected mice with biocytin. We then reconstructed their perisomatic region using fluorescent confocal microscopy to estimate their surface area. Using these morphological measurements, we found that the surface area was reduced by 38% from a median area of approximately 3,600  $\mu\text{m}^2$  in the AAV-EV transfected mice to approximately 2,200  $\mu\text{m}^2$  in the AAV-A53T transfected mice (Fig. 7V, left). These measurements were corroborated by an electrophysiological measurement of the membrane surface area. The whole-cell capacitance of a neuron scales with the somatic surface area because it is the product of the surface area and the specific capacitance of the bilipid membrane ( $C_m$ ) (Perrins, 1999). Measurements of the whole-cell membrane capacitance of the DMV neurons (Fig. 7B, right) demonstrated that it was reduced by 33% from approximately 32 pF in neurons transfected with AAV-EV to approximately 22 pF in DMV neurons transfected with AAV-A53T. Thus, there is a quantitative agreement between the A53T-SNCA induced reductions of surface area estimated by either electrophysiological or morphological methods.

Moreover, in both AAV treatments, the ratio of the median whole-cell capacitance to the median surface area very closely reproduced the known value of  $C_m$  ( $1 \mu\text{F}/\text{cm}^2$ ) (Perrins, 1999). In summary, the Kv4 channelopathy in human  $\alpha$ -synuclein-positive DMV neurons is likely caused by a mismatch of their Kv4 surface expression in shrinking DMV neurons.

### A. Selective shrinkage of human $\alpha$ -synuclein-positive DMV neurons

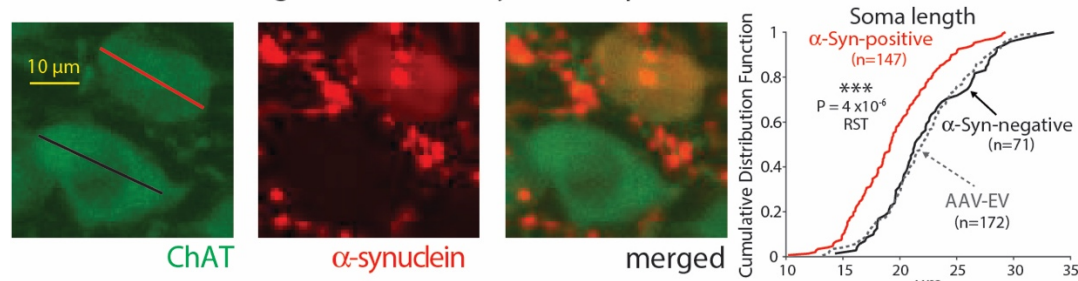

### B. DMV neuron surface area

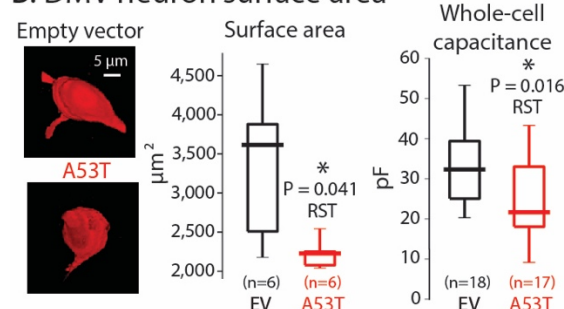

### C. Cav current density conserved

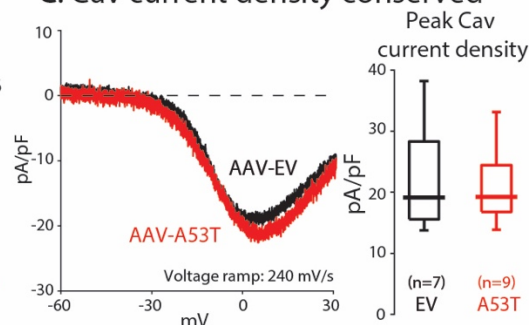

**Figure 7. Selective shrinkage of human  $\alpha$ -synuclein-positive DMV neurons.** (A) Left panels: examples of the measurement of the long axis of the soma of DMV neurons from mice injected with AAV-A53T. Staining for ChAT and human  $\alpha$ -synuclein, demonstrate the selective shrinkage of the human  $\alpha$ -synuclein-positive (long axis marked in red), but not the neighboring human  $\alpha$ -synuclein-negative neuron (long axis marked in black). Right panel: cumulative distribution function (cdf) of the lengths of human  $\alpha$ -synuclein positive and negative neurons. Dashed line indicates the cdf of neurons measured from the AAV-EV injected mice. (B) Left: Examples of biocytin filled DMV neurons from AAV-A53T and AAV-EV injected mice that were reacted with streptavidin conjugated to Alexa 594. Middle: box plots of the somatic surface areas of the biocytin-filled neurons as estimated with the FIJI software. Right: whole-cell capacitance measurement of DMV neurons from mice transfected with either AAV-EV or AAV-A53T. The morphological and physiological measurements demonstrate that only DMV neurons that express A53T  $\alpha$ -synuclein shrink. (C) Left: examples of the  $\text{Co}^{2+}$ -sensitive voltage-activated  $\text{Ca}^{2+}$  (Cav) current in response to fast voltage ramps from DMV neurons transfected with either AAV-EV (black) or AAV-A53T (red). Right: box plots of peak Cav current density, estimated by fitting activation curves to individual  $\text{Co}^{2+}$ -sensitive current density measurements (Lasser-Katz et al., 2017) indicate that they are equivalent under both AAV treatments despite the shrinkage, due to a downregulation of the total Cav current in DMV neurons transfected with AAV-A53T (data not shown). RST – two-tailed Wilcoxon Rank-Sum test.

Because Kv4 channel expression did not adapt to the A53T-driven reductions in surface area, we asked whether this maladaptation was selective to Kv4 channels. To address this, we measured voltage activated  $\text{Ca}^{2+}$  (Cav) currents. We found that the total Cav currents in DMV neurons were reduced (data not shown), as shown previously in transgenic mice overexpressing human A53T  $\alpha$ -synuclein (Lasser-Katz et al., 2017). Intriguingly, the reduction in Cav currents of DMV neurons in the AAV-A53T-transfected mice matched the reduction in their surface area. Thus, in contrast to Kv4 channels, Cav channels showed intact homeostatic control (Fig. 7C). Similarly, measures of other electrophysiological properties of the DMV pacemaking (e.g., action potential threshold, width and afterhyperpolarization) were largely unaffected (Supplementary Fig. 3), ruling out significant



changes to other voltage-activated channels involved in pacemaking (Cooper et al., 2015; Goldberg et al., 2012; Lasser-Katz et al., 2017). Taken together, these findings suggest that the A53T-induced Kv4 channelopathy in DMV neurons is both selective and maladaptive.

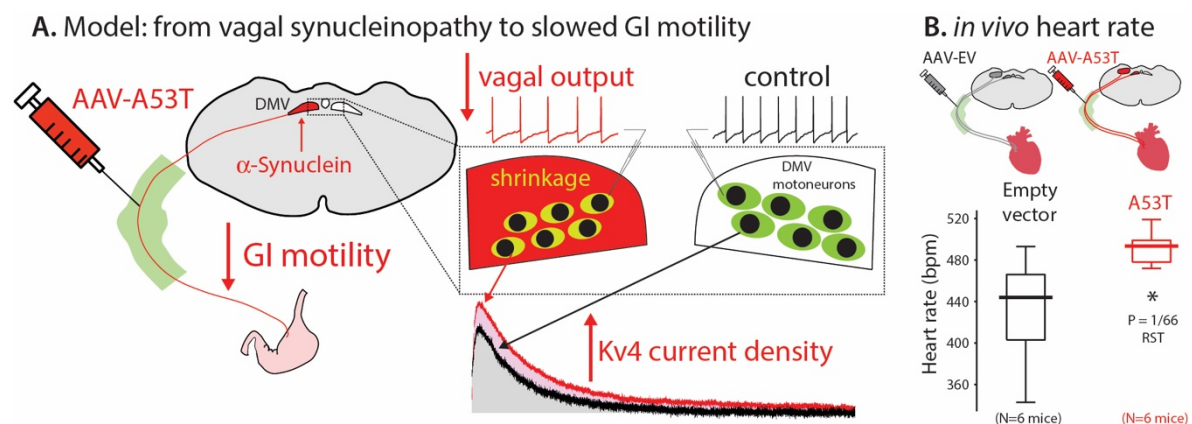

**Figure 8. Working model of the  $\alpha$ -synuclein-induced reduction in vagal output explains the reduction in GI motility as well as the observed elevation in resting heart rate.** (A) Medullary  $\alpha$ -synucleinopathy reduces vagal tone and GI motility due to a selective elevation in the surface density of Kv4 channels on DMV motoneurons that is secondary to their shrinkage. (B) Box plot of resting heart rate (HR) during anesthesia demonstrates that mice transfected with AAV-A53T have a higher HR than those transfected with AAV-EV, as expected when parasympathetic vagal tone to the heart is reduced. RST – two-tailed Wilcoxon Rank-Sum test.

### $\alpha$ -synucleinopathy in vagal motoneurons causally drives GI and cardiac dysfunction

In analogy to the mechanisms discovered in our mouse model (Fig. 8A), the cause of prodromal dysautonomia in PD might also have a functional component caused by a Kv4 channelopathy in DMV neurons. While the GI tract is a major downstream effector of vagal tone, monitoring changes in GI motility is invasive and expensive (De Pablo-Fernández et al., 2019). Monitoring heart rate (HR), by comparison, is readily accessible to medical practitioners and the general population (Valappil et al., 2010). Given that the cardiac branch of the right vagus nerve innervates the sinoatrial node and includes non-myelinated axons arising from DMV (Nosaka et al., 1982), HR is expected to increase in response to a reduction in the spontaneous discharge of DMV motoneurons, which reduces parasympathetic tone. We measured the basal HR in our mouse model one hour after induction of anesthesia and found that the basal HR was significantly elevated in the mice transfected with AAV-A53T as compared to AAV-EV (Fig. 8B), underscoring HR as a potential readout of  $\alpha$ -synuclein-induced DMV dysfunction in prodromal PD (Fleming et al., 2013).

## Discussion

The notion that brain stem  $\alpha$ -synucleinopathies are linked to prodromal NMS of PD, including dysautonomia (e.g., constipation) is not new (Beach et al., 2010; Wakabayashi et al., 1988). Earlier studies have even proposed that clinical autonomic measures may be sensitive enough to gauge the degree of brain stem LPs (Valappil et al., 2010). However, it is unknown whether it is  $\alpha$ -synuclein-induced cell loss in brain stem nuclei like the DMV (Eadie, 1963; Halliday et al., 1990) that is responsible for the dysautonomia. Functional

changes induced by  $\alpha$ -synuclein might also contribute to vagal dysfunction and might even precede cell-loss mediated impairments. These functional changes can be divided into cell-autonomous effects (e.g. altered physiology of DMV neurons that harbor  $\alpha$ -synuclein pathology) (Thakur et al., 2019) and non-autonomous effects (e.g. involvement of surrounding microglia leading to neuroinflammation) (Surmeier et al., 2017). In contrast to the strong evidence for neuroinflammation and cell loss in prodromal PD (Surmeier et al., 2017), we know nothing about functional changes in viable DMV neurons in humans and only very little in model systems (Thakur et al., 2019). In a global A53T-SNCA transgenic mouse model, we previously reported *in vitro* reductions in activity-dependent calcium loading and oxidative impairment of Kv4 channels in DMV neurons (Lasser-Katz et al., 2017). In contrast, global transgenic expression of mutant  $\alpha$ -synuclein led to *in vivo* and *in vitro* hyperexcitability with Kv4 dysfunction in dopamine substantia nigra neurons (Subramaniam et al., 2014). Importantly, these global transgenic models cannot capture prodromal PD states where  $\alpha$ -synuclein pathology is restricted to a small number of sites. Based on immunohistochemical studies in human brains, Braak and colleagues have proposed a set of six stages of increasing expansion of LP-pathology, which have been confirmed by others and may represent the most common spatiotemporal sequence of LP pathology (Kim et al., 2019; Ulusoy et al., 2013). Importantly, LP pathology in DMV is a hallmark of the earliest Braak Stage I (Braak et al., 2004) and might be associated with various degrees of cell loss (Eadie, 1963; Halliday et al., 1990; Surmeier et al., 2017). The demonstration of  $\alpha$ -synuclein spreading throughout neural circuits in rodent model (Luk et al., 2012; Rey et al., 2018; Ulusoy et al., 2013) provided a plausible biological mechanism in support of the Braak hypothesis. Moreover, even processes that are currently believed to occur the earliest stages including the spread from the periphery to DMV neurons where successfully modelled in rodents (Holmqvist et al., 2014; Kim et al., 2019; Ulusoy et al., 2013). However, as potential functional implications are still unknown, we expanded these prodromal models to include functional physiological studies *in vitro* and *in vivo*.

In our model, 6 weeks after injection of AAV-A53T into the cervical vagus, the  $\alpha$ -synuclein immunoreactivity was restricted to fibers, but not somata, in the NTS and area postrema. These fibers belong to afferent sensory fibers whose somata are located outside the cranium. Thus, the  $\alpha$ -synuclein expressed in the afferent fibers seems not to cross trans-synaptically into their target neurons in the NST and area postrema. Similarly,  $\alpha$ -synuclein taken up by efferent (including DMV motoneuron) fibers does not cross trans-synaptically into the GI tract (Ulusoy et al., 2017), leaving, as we demonstrated here, the intrinsic physiological properties of the GI nerves and muscles intact. Also, our stereological analysis demonstrated that  $\alpha$ -synuclein expression in DMV neurons did not induce cell death *per se*. Thus, our model is well suited to capture a very early timepoint in prodromal PD, where the phenotype is mostly driven by the pathophysiology of DMV neurons. Indeed, we have demonstrated that a selective physiological dysregulation of Kv4 channel density in DMV neurons causes a reduction in vagal output, which slows GI motility and elevates HR.

We have shown previously that DMV neurons in transgenic mice that globally overexpresses human A53T  $\alpha$ -synuclein undergo cell-autonomous adaptations (compared

with control mice) in the form of a transcriptional downregulation of Cav currents, which leads to lower basal mitochondrial oxidative stress (Lasser-Katz et al., 2017). In the current, adult onset brain stem-selective  $\alpha$ -synucleinopathy model, we replicated the reduction in total Cav current. However, the present study sheds new light on that result. We have now established that the total Cav current is homeostatically downregulated to maintain a stable surface density in shrinking neurons. Similarly, the fact that the action potential threshold, width and afterhyperpolarization are largely unaffected suggests that the persistent sodium, and the large- and small-conductance calcium activated potassium currents, respectively (Goldberg et al., 2012; Lasser-Katz et al., 2017), are either hardly affected by the shrinkage (e.g., arise from compartments such as the axon that may not be affected by the shrinkage) or undergo some adaptive regulation like the Cav currents. Against this backdrop, it is unclear why the Kv4 currents selectively fail to normalize during the  $\alpha$ -synuclein-mediated shrinkage of DMV neurons.

We made use of human mutated A53T  $\alpha$ -synuclein, as it is an established cause for familial PD (Polymeropoulos et al., 1997; Thakur et al., 2019) but – although not explicitly tested - we expect a similar pathophysiology in response to overexpression of human wild-type  $\alpha$ -synuclein. In any case, this is the first study to provide a causal link from  $\alpha$ -synuclein to ion channel dysregulation and reduced neuronal activity *in vivo* to prodromal non-motor symptoms. This establishes an additional perspective – cell-autonomous neuronal pathophysiology – in the etiology of PD to complement well-established pathological and molecular approaches. It also provides a novel set of questions for follow-up studies to understand which molecular and cell-biological mechanisms induce  $\alpha$ -synuclein-mediated shrinkage and channel dysregulation (Fang et al., 2017; Ulusoy et al., 2015).

## Clinical implications

In our model, the induction of an  $\alpha$ -synucleinopathy in DMV motoneurons caused shrinkage and dysregulated surface densities of Kv4 channels, which in turn reduced firing rates. This reduction in vagal tone effectively slowed GI motility. If a similar mechanism is operative in prodromal PD patients with impaired GI motility, the translational challenge would be to establish a selective functional test for prodromal patients or others at risk for PD. As we have identified Kv4 channels in DMV neurons as molecular targets, a selective pharmacological challenge would be conceptually most promising. While there is currently no selective Kv4 channel modulator in the clinic, the non-selective Kv channel blocker 4-aminopyridine (Luca et al., 2017), used in multiple sclerosis (Lecat et al., 2017) and Lambert-Eaton myasthenic syndrome (Oh et al., 2016), could potentially be useful. For readout of these tests, in principle, monitoring changes in GI motility or heart rate are possible, the latter with much more clinical utility. Even in the absence of selective Kv4 pharmacology, the shifted dynamic range of DMV output might be currently best tested by monitoring heart rate during mild exercise followed by an atropine (a muscarinic antagonist) challenge (as was developed for diabetic neuropathy (Banthia et al., 2013)). In essence, the new level mechanistic understanding provided by our study could form the basis for an improved differential diagnosis of prodromal dysautonomia in PD.

# Acknowledgments

This work was supported by grants from the German-Israeli Foundation for Scientific Research and Development (no. I-1294-418.13/2015) to J.R. and J.A.G, the Collaborative Research center 815 “Redox Signaling” program to J.R, and the European Research Council (no. 646880) to J.A.G. We thank Prof. Aron Troen for help with the stereological analyses, and Engs. Eugene Konyukhov and Anatoly Shapochnikov for excellent technical support.

# Author Contributions

Conceptualization, W-H.C., J.R. and J.A.G.; Methodology, W-H.C., R.E.M., H.A-Z., D.B-Z., M.H., J.R. and J.A.G.; Formal Analysis, W-H.C., R.M. and J.A.G.; Investigation, W-H.C., L.K., R.E.M, H.A-Z.,D.B-Z., J.A.G.; Resources, J.B.K., J.M.B, R.Y, M.H., J.R. and J.A.G.; Data Curation, W-H.C, R.E.M., J.R. and J.A.G; Writing – Original Draft, J.R. and J.A.G; Writing – Review & Editing, W-H.C., L.K., R.E.M, H.A-Z., J.B.K., J.M.B., D.B-Z., M.H., J.R. and J.A.G.; Visualization, W-H.C., R.E.M, J.R. and J.A.G; Supervision, J.R. and J.A.G.; Project Administration, J.R. and J.A.G.; Funding Acquisition, J.R. and J.A.G.

# Declaration of Interests

The authors declare no competing interests.

# STAR Methods

Ethical Statement. All experimental procedures on mice adhered to and received prior written approval from the Hebrew University Institutional Animal Care and Use Committee and from the German Regierungspräsidium Darmstadt.

Animals. All experiments were conducted on male C57BL/6JRccHsd mice except for the chemogenetic experiments (see below) which were conducted one homozygous male ChAT-IRES-Cre transgenic mice (Jackson Laboratory, stock no. 006410).

Cervical vagus injections. 6-7 week old mice (>25 grams) were anesthetized with an *i.p.* mixture of ketamine (100 mg/kg) and medetomidine (83 µg/kg) and ointment was applied to prevent corneal drying. Mouse was held in place in a supine position with paper tape, and temperature was maintained at 37°C with a heating pad. Animals were hydrated with a bolus of injectable saline (5 ml/kg) mixed with an analgesic (5 mg/kg carprofen). The hairs around the neck area were removed with an electric razor and hair removing gel. Before cutting the skin, 70% alcohol and betadine were used to sterilize at that area. The central line of the skin was vertically cut with surgical scissors from the sternum area to the lower jaw area (app. 2cm long), and the thoracic glands were gently teased apart. For unilateral injections, the right cervical vagus was exposed from beneath the carotid (after careful separation from fat and connective tissue) and held away from the pulsations with a paper pointer. The nerve was



pierced with a glass pipette pulled to a very fine tip (3-4 times thinner than the vagus nerve trunk), and adeno-associated virus (AAV) particles were injected with a Nanoject 3 (Drummond scientific) at a speed of 1 nl/sec for 30 secs injection with 30 secs pause for a total 33 cycles (i.e., a 990 nl in total). After the injection, the pipette was left for an extra 1 min before slowly being retracted. At this point, the injection step terminated, and the paper pointer was gently removed so as not to damage the nerve. For bilateral injections the process was repeated on the left side. Both glands were placed back above the neck region, and the skin was sutured. At the end, the betadyne and alcohol sterilization was repeated. The animal was woken up with Anti-Sedan (0.42mg/kg *i.p.*) and kept warm until it is awake (app. in 30 mins). Animals were monitored and received carprofen for 3 additional days.

Adeno-associated viruses (AAVs). The C57BL/6JRccHsd mice were injected with  $5 \times 10^{12}$  GC/ml of AAVs that either harbors a human mutated A53T form of the  $\alpha$ -Synuclein gene (AAV1/2-CMV/CBA-human-A53T-alpha-synuclein-WPRE-BGH-polyA) or the harbors an empty vector (EV) (AAV1/2-CMV/CBA-empty vector-WPRE-BGH-polyA) (Genedetect, new Zealand). The ChAT-IRES-Cre mice were injected with an AAV that harbors a Gi Designer Receptor Exclusively Activated by Designer Drug (DREADD) gene (AAV9-hSyn-DIO-hM4Di-mCherry,  $8.8 \times 10^{12}$  GC/ml, ELSC Vector core), which unlike in the case of the C57BL/6 JRccHsd mice only expressed in the cholinergic cells of the DMV and not in the NST.

In vivo GI motility assay. One week before AAV transfection, the C57BL/6JRccHsd mice (>25 g) were lightly sedated with isoflurane until the breathing pattern reached to 1 cycle/sec (observed from the chest movement). Mice were gavaged, between 10 and 11 am, with 0.3 ml of 6% carmine-red (Sigma, Germany) mixed with 0.5% methyl cellulose (Sigma, Germany) using a 22G feeding tube. After 2.5 hours, the animals were transferred into a clean cage with fresh beddings, in order to monitor the latency at which the first reddish feces pellets were observed. The gavage feeding was repeated twice per animal (once per day) to determine consistent and stable results. Mice that were inactive or asleep (approximately 15%) were excluded. The actual measurements of passage time were conducted 3 and 6 weeks after transfection.

Stool mass measurement. Mice injected with either AAV-EV or AAV-A53T was housed individually between 10 and 11 am in a clean cage with fresh beddings. Two and a half hours later the stools were collected and dehydrated, and the total stool mass was measured.

Chemogenetics. ChAT-Cre transgenic mice that were transfected with the AAV harboring the DREADDs were tested 5-6 weeks post transfection. Each animal was subjected to 3 measurements on 3 different days. On the first day, the animals were gavage and *i.p.* injected with vehicle injection of 0.9% saline (10 ml/kg). Two days later, in order to activate the Gi DREADDs overexpressed in the DMV the mice received an identical gavage feeding with an *i.p.* injection of 3 mg/kg water-soluble clozapine-*N*-oxide (CNO, HelloBio, UK) dissolved in injectable 0.9% saline. Following an additional 2 days, the vehicle gavage was repeated.

*Ex vivo* GI motility assay. Mice were perfused transcardially with ice-cold 0.9% phosphate buffered saline (for histological verification of DMV transfection, see below) and the entire GI tract from between the diaphragm and cecum was transferred into ice-cold Krebs solution carbogenated with 95% O<sub>2</sub>–5% CO<sub>2</sub> and containing (in mM): 118 NaCl, 4.7 KCl, 14.4 NaHCO<sub>3</sub>, 5 CaCl<sub>2</sub> 1.2 MgSO<sub>4</sub>, 1.2 NaH<sub>2</sub>PO<sub>4</sub>, 11.5 glucose. Sections of the ileum (approx. 1 cm long) were immersed in an organ bath (20 ml volume) filled with warm (37°C), carbogenated Krebs solution, and tied with a silk suture to a force transducer. The transducer signal was logged onto a PC computer with a National Instruments A/D board using custom made code in LabView (National Instruments). Sections were given 30 minutes to accommodate during which spontaneous contractions were recorded and then were subjected to increasing concentrations on pilocarpine (Sigma). Electric field stimulation (EFS) was conducted with a Grass S44 Stimulator using 0.5-ms-long, 55V pulses at 1, 2, 5, 10, 20 and 30 Hz for a duration of 15 s. The current was passed between two rings that surrounded (but did not touch) the ileal section inside the organ bath. We used spectral analysis to characterize spontaneous contractions and fit Hill equations to the dose response curves of tension as a function of pilocarpine concentration or EFS frequency.

*In vivo* recordings and juxtacellular labeling. Mice were anesthetized in a non-rebreathing system with isoflurane (induction 2.5%, maintenance 0.8–1.4% in O<sub>2</sub>, 0.35 l/min) and were placed in a stereotaxic frame (David Kopf) and eye lubricant (Visidic, Bausch and Lomb, Berlin, Germany) was applied to prevent corneal drying. Lidocaine/prilocaine ointment (Emla<sup>®</sup> cream, Astra Zeneca, Wedel, Germany) was used as a local analgesic at the incision site. Body temperature (33–36°C), heart rate (5–10 Hz), and respiration (1–2 Hz) were constantly monitored by the vital sign oximeter (Mouse OX, STARR Life Sciences, USA). Bregma was set to be 1 mm lower than lambda, so that the exposed brain stem will lie in a horizontal plane. All the neck muscles attached on the occipital bone were removed, a small craniotomy ( $\pm$  0.5 mm from midline) was bored at the caudal position -4.0 to -4.3 mm from lambda. Micromanipulator (SM-6, Luigs and Neumann) was used to lower the electrodes (1–2  $\mu$ m/sec) to the recording site [For DMV – AP: -4.1 to -4.3 mm (from lambda), ML:  $\pm$  0.1 to 0.3 mm (from lambda), DV: -2.8 to -3.0 mm (from the surface of cerebellum; For NTS – same AP and ML, DV: -2.3 to -2.7 mm].

Glass electrodes (10–20 M $\Omega$ ; Harvard Apparatus) filled with 0.5 M NaCl, 10 mM HEPES, 1.5% neurobiotin (Vector Laboratories) were used for recording. The extracellular single-unit activity was recorded for 1–3 mins and the signals were acquired with EPC-10 A/D converter (PatchMaster software, Heka; sampling rate 12.5 kHz for spike train analyses and 20 kHz for AP waveform analyses). The extracellular signals were amplified 1,000x (ELC-03M, NPI Electronics), notch- and bandpass-filtered 0.3–5 kHz (single-pole, 6 dB/octave, DPA- 2FS, NPI Electronics). The signals were displayed both on an analog oscilloscope and via an audio monitor.

To identify the anatomical location and neurochemical identity of the recorded neuron, following extracellular single-unit recordings, the neurons were labeled with neurobiotin

using juxtacellular in vivo labeling technique (Pinault, 1996). Microionophoretic current was applied (1-7 nA positive current, 200 ms on/off pulse), via the recording electrode with continuous monitoring of the firing activity. The labelling was considered successful if the firing pattern of the neuron was modulated during current injection (i.e., to observe an increased activity during on-pulse and absence of activity in the off-pulse) (Schiemann et al., 2012; Subramaniam et al., 2014) and the process was stable for a minimum of 25 s followed by a rebound to spontaneous activity of the neuron after modulation. This procedure enabled us to map the recorded DMV neurons within the medulla. Thirty percent of recorded DMV neurons stopped firing either before or during the labelling procedure. In those cases the labelling protocol was carried on until the current reached 5-7 nA, in order to create a micro-trauma to verify the location within the DMV.

After recordings mice were euthanized (Na-pentobarbital, 1.6 g/kg) and transcardially perfused with 4% paraformaldehyde, 15% picric acid in PBS, pH 7.4. The perfused brain was stored in PFA overnight and changed to 10% sucrose and 0.05% NaN<sub>3</sub> solution for long-term storage.

**Slice physiology.** Six weeks post vagal transfection, mice were deeply anesthetized with intraperitoneal injections of ketamine (200 mg/kg) – xylazine (23.32 mg/kg) and perfused transcardially with ice-cold modified artificial CSF (ACSF) oxygenated with 95% O<sub>2</sub>–5% CO<sub>2</sub> and containing the following (in mM): 2.5 KCl, 26 NaHCO<sub>3</sub>, 1.25 Na<sub>2</sub>HPO<sub>4</sub>, 0.5 CaCl<sub>2</sub>, 10 MgSO<sub>4</sub>, 10 glucose, 0.4 Ascorbic acid, and 210 sucrose. The cerebellum, pons and medulla were rapidly removed, blocked in the coronal plane, and sectioned at a thickness of 240 µm in ice-cold modified ACSF. Slices were then submerged in ACSF, bubbled with 95% O<sub>2</sub>–5% CO<sub>2</sub>, and containing (in mM): 2.5 KCl, 126 NaCl, 26 NaHCO<sub>3</sub>, 1.25 Na<sub>2</sub>HPO<sub>4</sub>, 2 CaCl<sub>2</sub>, 2 MgSO<sub>4</sub>, and 10 glucose. The slices were transferred to the recording chamber mounted on an upright Zeiss Axioskop fixed-stage microscope and perfused with oxygenated ACSF at 32°C. A 60X, 0.9 NA water-immersion objective was used to examine the slice using standard infrared differential interference contrast video microscopy. Patch pipette resistance was typically 3–4.5 MΩ. A junction potential of 7–8 mV was not corrected. For cell-attached current-clamp recordings of firing patterns, whole-cell current clamp recordings and voltage clamp recordings of potassium currents the pipette contained (in mM): 135.5 KCH<sub>3</sub>SO<sub>3</sub>, 5 KCl, 2.5 NaCl, 5 Na-phosphocreatine, 10 HEPES, 0.2 EGTA, 0.21 Na<sub>2</sub>GTP, and 2 Mg<sub>1.5</sub>ATP (pH=7.3 with KOH, 280–290 mOsm/kg). For whole cell voltage clamp recordings of calcium currents the pipette contained (in mM): 111 CsCH<sub>3</sub>SO<sub>3</sub>, 12.5 CsCl, 1 MgCl<sub>2</sub>, 0.1 CaCl<sub>2</sub>, 10 HEPES, 1 EGTA, 0.21 Na<sub>2</sub>GTP, and 2 Mg<sub>1.5</sub>ATP (pH=7.3 with CsOH, 280–290 mOsm/kg). In some experiments biocytin (0.2 % w/v) was added to this internal solution. We used a mixture of synaptic receptor blockers containing the following (in µM): 50 d-APV, 5 NBQX, 10 SR 95531, 1 CGP 55845, 10 mecamylamine, and 10 atropine. For whole cell calcium current recordings, HEPES-based bath solutions were used. The first solution contained (in mM): 137 NaCl, 1.8 CaCl<sub>2</sub>, 1 MgCl<sub>2</sub>, 5.4 tetraethylammonium (TEA)-Cl, 10 4-AP, 0.001 tetrodotoxin (TTX), 5 HEPES and 10 glucose (pH=7.3 with NaOH), and the second solution was identical except for an equimolar substitution of CaCl<sub>2</sub> with CoCl<sub>2</sub> (pH=7.3 with NaOH).

**Brain stem histology:** The brain stem was sliced at 30  $\mu$ m thickness with a cryostat (Leica CM1950) and the tissue was stored in an antifreeze solution (Chiu et al., 2014). For the immunofluorescent staining, after 4 x rinse/5 mins in 0.1M PB solution, the slices were incubated in normal donkey serum for 1 hour. Then, the tissue was incubated overnight in the primary antibodies dissolved with 0.3% Triton 0.1M PB with 10% normal donkey serum. The following primary antibodies were used: Mouse anti-human synuclein (1:5000, Thermo Fisher Scientific; RRID:AB\_1954821; Recombinant rabbit anti-phospho S129 alpha synuclein, 1:2000, Abcam 51253); the goat anti-ChAT (1:100, Millipore; RRID: AB\_262156)]. On the second day, the tissue was incubated in the secondary antibodies at the room temperature for 2 hours after washing steps. The following secondary antibodies were used: anti-mouse Alexa 488 (1:1000); anti-goat cy5 (1:1000); streptavidin conjugated to Cy3 (Abcam, UK); biotinylated donkey anti-rabbit (1:1000, Jackson ImmunoResearch). The sections treated with biotinylated antibodies were further incubated for one hour in avidin-biotin-peroxidase solution (ABC Elite, Vector laboratories, Burlingame, USA). The protein was finally visualized by a 0.1M PB solution containing 5% 3,3'-diaminobenzidine (DAB) (Sigma, Germany) and 0.02% H<sub>2</sub>O<sub>2</sub>. The sections were mounted on glass slides and dehydrated in a series concentration of ethanol followed an incubation of cresyl-violet solution (Sigma, Germany). Afterwards, the DAB/Nissl stained sections were shortly incubated in xylene (Merck, Germany) and cover-slipped using mounting gel (Toluene solution, Fisher Scientific). The tissue of fluorescent staining was mounted (Vectashield, Vector Laboratories) on glass slides after 4x rinse in 0.1M PB.

The brain stem samples for the cohort of the juxtacellular recording were cut in to 50  $\mu$ m thick slices (VT1000S microtome, Leica). Sections were rinsed in PBS and then incubated in a blocking solution (0.2 m PBS with 10% horse serum, 0.5% Triton X-100, 0.2% BSA). The following primary antibodies were used (in carrier solution, 22°C, overnight); monoclonal mouse anti-human  $\alpha$ -synuclein (1:1000, 4B12, Thermo Fisher Scientific); the goat anti-ChAT (1:100, Millipore; RRID:AB\_262156). The following secondary antibodies (in carrier solution, 22°C, overnight): AlexaFluor-488 donkey anti-goat, AlexaFluor-488 donkey anti-mouse and Streptavidin AlexaFluor-568 (1:1000; Molecular Probes) were used. Sections were rinsed in PBS and mounted on slides (Vectashield, Vector Laboratories).

For semiquantitative optical density analysis of the human  $\alpha$ -synuclein expression in DMV neurons, we used ImageJ software (<http://rsbweb.nih.gov/ij/>) to determine the mean immunosignal intensities of ChAT-positive regions of interest in the brain stem slices. We used three confocal slices through the DMV from each mouse with a total of three AAV-A53T and AAV-EV injected mice for the analysis. Each confocal slice was a collapsed z-stack of 10 adjacent 1- $\mu$ m-thick optical slices chosen so that they arose primarily from within individual DMV neurons. Thus, while it is not possible to rule out the possibility that some of the fluorescence arises from other processes (e.g., glia), the majority of the signal is confined to ChAT-immunopositive neuronal somatodendritic domains in the DMV.

**Stomach and intestine histology:** After 200 nl AAV1/2-A53T-SNCA (the same virus used for vagal injection) intramuscularly injected in the stomach, two weeks after surgery, the mouse



was euthanized for immunofluorescent staining. The staining procedure was processed as previously described (Abu-Gazala et al., 2018).

### Fluorescence microscopy and cell size analysis

*Cell surface area:* Confocal images of biocytin-filled cells reacted with streptavidin conjugated to Cy3 were captured on a Nikon confocal 1AR microscope under a Plan Apochromat Lambda 60x oil objective. Images were over-sampled in the z-plane for maximum preservation of 3D structure (pixel size  $xy = 0.138 \mu\text{m}$ ; voxel depth  $z = 0.125 \mu\text{m}$ ), and were processed and analyzed with FIJI software (ImageJ, NIH, version 2.0.0). The area encompassing the cell soma was cropped to discard neurites. A Gaussian blur was applied to the voxels (sigma radius = 1.0), and where necessary cells were filled so that only voxels on the cell surface were used for calculations. A threshold was set for each cell, and the total surface area were analyzed using the 3D objects counter plugin (FIJI). Only complete cells were included in the analysis.

*Cell Diameter:* 6 weeks after injection with either AAV-EV (N=2 mice) or AAV-A53T (N=3 mice), we took confocal images of ChAT / human  $\alpha$ -synuclein staining from 30  $\mu\text{m}$  thick slides of DMV. In each slide, we collapsed 10-15 adjacent 1- $\mu\text{m}$ - thick confocal images from the middle part of each slide in to a single image. We collected 5 such collapsed images that were approximately 150  $\mu\text{m}$  apart from between AP: -7.32 to AP:-7.64 (from bregma). In each of the 5 images, we randomly selected ChAT-positive neurons with or without immunoactivity of anti-human  $\alpha$ -synuclein from the medial-dorsal portion of DMV and measured the longest axis of their soma using the ImageJ software (NIH, USA).

Stereological quantification of DMV neuron number: The number of Nissl-stained DMV neurons was stereologically quantified, as previously described (Musgrove et al., 2019). Briefly, the DMV was delineated from every 5<sup>th</sup> section of the DMV between Bregma -7.32 mm and -7.20 mm. Neuronal counts were performed on a Zeiss Axio Imager 2 microscope or an Olympus BX53, fitted with a Prior ProScan III motorised stage. The optical fractionator technique was used, and was facilitated by either Stereo Investigator version 10, (MBF Biosciences), or newCAST software (Visiopharm). Total cell numbers were calculated according to the methods outlined by Gundersen and Jensen (Gundersen and Jensen, 1987). A guard zone of at least 1  $\mu\text{m}$  was set. Coefficient of error was calculated with values  $<0.10$  accepted (Gundersen and Jensen, 1987).

Data and Statistical Analysis: Data were analyzed and curve fitting was done using custom-made code on Matlab (The Mathworks, Natick, MA) software. The two-tailed Wilcoxon rank-sum test (RST) was used to test for changes of medians in two independent sample comparisons. The two-tailed Wilcoxon signed-rank test (SRT) was used to test for changes of medians in matched-paired comparisons. Two-tailed ANCOVA was used to test the difference between curves. The null hypotheses were rejected if the P values were below 0.05.

## Supplementary Information

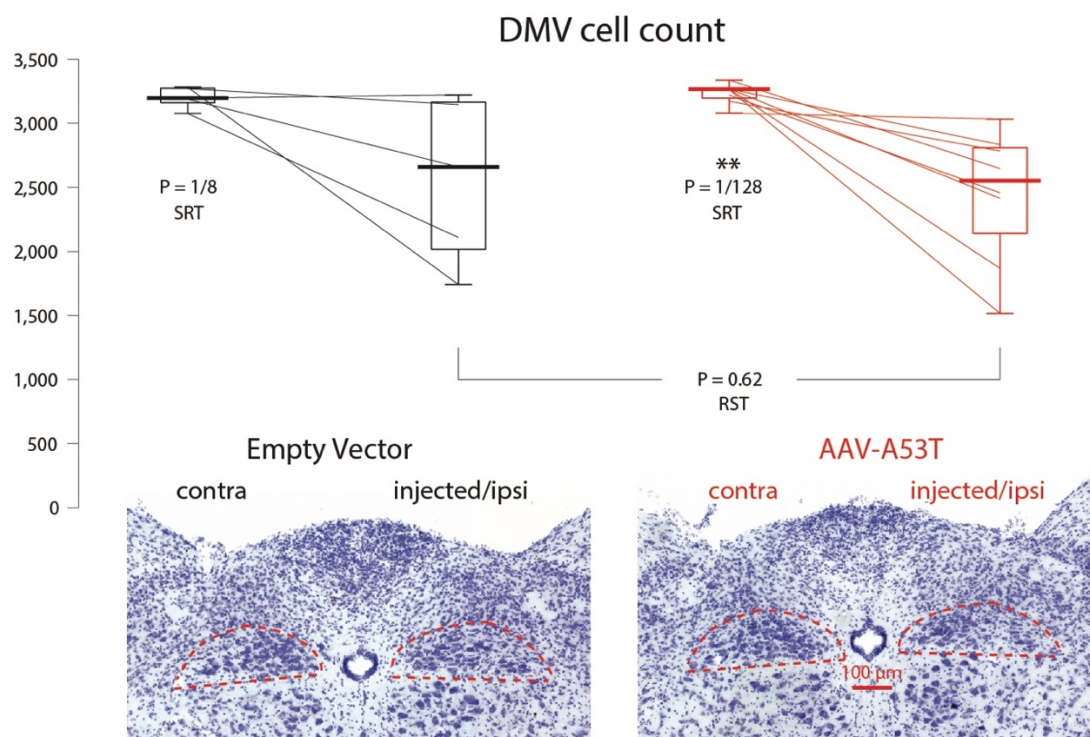

**Supplementary Figure 1. Variable DMV cell loss following cervical vagal AAV injections is not attributable to the  $\alpha$ -synucleinopathy *per se*.** Box plot of the total unbiased stereological count of Nissl-stained neurons in the DMV in the noninjected (contralateral) and injected (ipsilateral) sides of mice injected with either AAV-EV (black) or AAV-A53T (red). Insets: examples of Nissl-stained slices of the dorsal medulla, with the DMV indicated by the dashed red line. RST – two-tailed Wilcoxon Rank-Sum test; SRT – Wilcoxon Signed-Rank test.

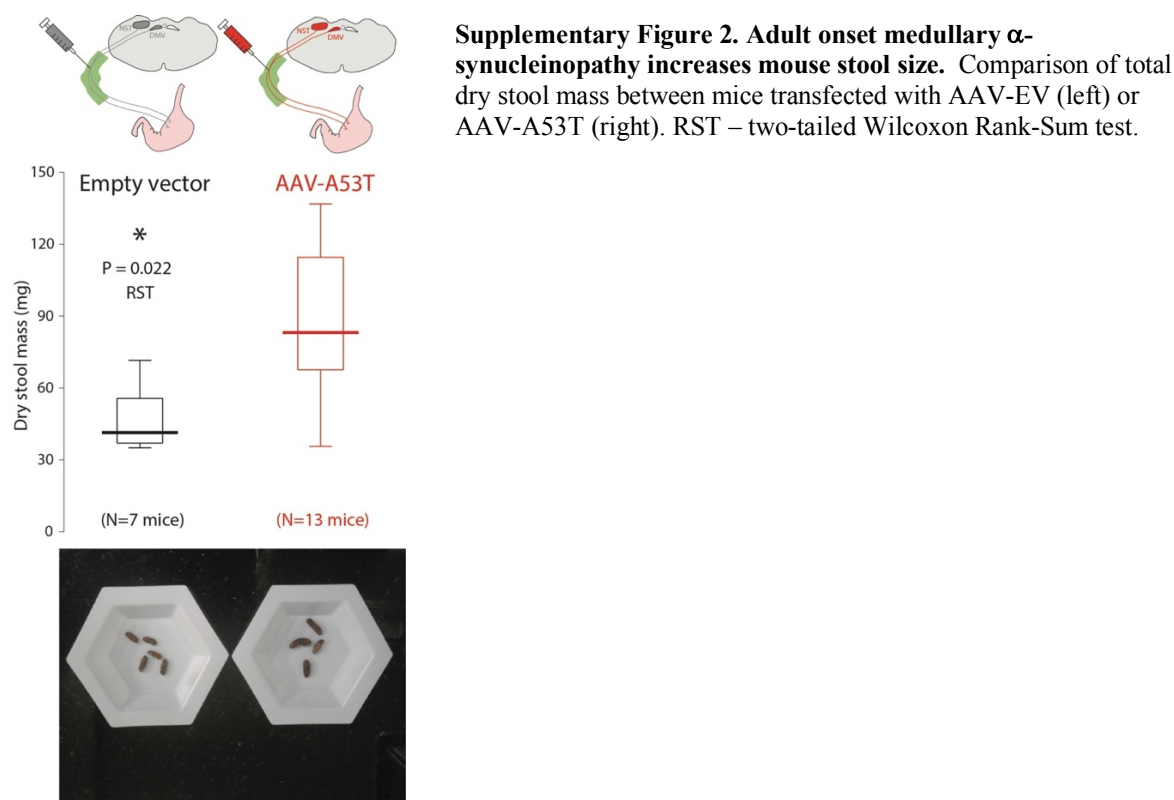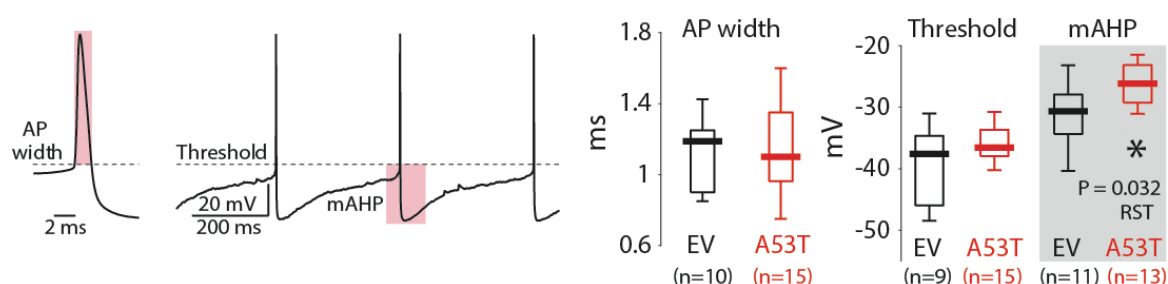

## References

- Abu-Gazala, S., Horwitz, E., Schyr, R.B.H., Bardugo, A., Israeli, H., Hija, A., Schug, J., Shin, S., Dor, Y., Kaestner, K.H., et al. (2018). Sleeve gastrectomy improves glycemia independent of weight loss by restoring hepatic insulin sensitivity. *Diabetes* 67, 1079–1085.
- Arnaldi, D., Meles, S.K., Giuliani, A., Morbelli, S., Renken, R.J., Janzen, A., Sittig-Wiegand, E., Depboylu, C., Reetz, K., Overeem, S., et al. (2019). Brain glucose metabolism heterogeneity in idiopathic REM sleep behavior disorder and in Parkinson's disease. *J. Parkinsons. Dis.* 9, 229–239.
- Banthia, S., Bergner, D.W., Chicos, A.B., Ng, J., Pelchovitz, D.J., Subacius, H., Kadish, A.H., and Goldberger, J.J. (2013). Detection of cardiovascular autonomic neuropathy using exercise testing in patients with type 2 diabetes mellitus. *J. Diabetes Complications* 27, 64–69.
- Beach, T.G., Adler, C.H., Sue, L.I., Vedders, L., Lue, L.F., White, C.L., Akiyama, H., Caviness, J.N., Shill, H.A., Sabbagh, M.N., et al. (2010). Multi-organ distribution of phosphorylated  $\alpha$ -synuclein histopathology in subjects with Lewy body disorders. *Acta Neuropathol.* 119, 689–702.
- Bonaz, B., Sinniger, V., and Pellissier, S. (2016). Vagal tone: Effects on sensitivity, motility, and inflammation. *Neurogastroenterol. Motil.* 28, 455–462.
- Braak, H., Del Tredici, K., Rüb, U., de Vos, R.A.I., Jansen Steur, E.N.H., and Braak, E. (2003). Staging of brain pathology related to sporadic Parkinson's disease. *Neurobiol. Aging* 24, 197–211.
- Braak, H., Ghebremedhin, E., Rub, U., Bratzke, H., and Del Tredici, K. (2004). Stages in the development of Parkinson's disease-related pathology. *Cell Tissue Res* 318, 121–134.
- Brundin, P., Dave, K.D., and Kordower, J.H. (2017). Therapeutic approaches to target alpha-synuclein pathology. *Exp. Neurol.* 298, 225–235.
- Chiu, W.-H., Carlsson, T., Depboylu, C., Höglinger, G.U., Oertel, W.H., and Ries, V. (2014). Selegiline normalizes, while l-DOPA sustains the increased number of dopamine neurons in the olfactory bulb in a 6-OHDA mouse model of Parkinson's disease. *Neuropharmacology* 79.
- Cooper, G., Lasser-Katz, E., Simchovitz, A., Sharon, R., Soreq, H., Surmeier, D.J., and Goldberg, J.A. (2015). Functional segregation of voltage-activated calcium channels in motoneurons of the dorsal motor nucleus of the vagus. *J Neurophysiol* 114, 1513–1520.
- Eadie, M.J. (1963). The Pathology of Certain Medullary Nuclei in Parkinsonism. *Brain* 86, 781–792.
- Fang, F., Yang, W., Florio, J.B., Rockenstein, E., Spencer, B., Orain, X.M., Dong, S.X., Li, H., Chen, X., Sung, K., et al. (2017). Synuclein impairs trafficking and signaling of BDNF in a mouse model of Parkinson's disease. *Sci. Rep.* 7, 1–13.
- Farrer, M., Wavrant-De Vrieze, F., Crook, R., Boles, L., Perez-Tur, J., Hardy, J., Johnson, W.G., Steele, J., Maraganore, D., Gwinn, K., et al. (1998). Low frequency of  $\alpha$ -synuclein mutations in familial Parkinson's disease. *Ann. Neurol.* 43, 394–397.
- Fleming, S.M., Jordan, M.C., Mulligan, C.K., Masliah, E., Holden, J.G., Millard, R.W., Chesselet, M.F., and Roos, K.P. (2013). Impaired baroreflex function in mice overexpressing alpha-synuclein. *Front. Neurol.* 23, 103.



- Goldberg, J.A., Guzman, J.N., Estep, C.M., Ilijic, E., Kondapalli, J., Sanchez-Padilla, J., and Surmeier, D.J. (2012). Calcium entry induces mitochondrial oxidant stress in vagal neurons at risk in Parkinson's disease. *Nat Neurosci* 15, 1414–1421.
- Goldstein, D.S. (2003). Dysautonomia in Parkinson's disease: Neurocardiological abnormalities. *Lancet Neurol.* 2, 669–676.
- Gundersen, H.J.G., and Jensen, E.B. (1987). The efficiency of systematic sampling in stereology and its prediction. *J. Microsc.* 147, 229–263.
- Halliday, G.M., Blumbergs, P.C., Cotton, R.G.H., Blessing, W.W., and Geffen, L.B. (1990). Loss of brainstem serotonin- and substance P-containing neurons in Parkinson's disease. *Brain Res.* 510, 104–107.
- Holmqvist, S., Chutna, O., Bousset, L., Aldrin-Kirk, P., Li, W., Björklund, T., Wang, Z.Y., Roybon, L., Melki, R., and Li, J.Y. (2014). Direct evidence of Parkinson pathology spread from the gastrointestinal tract to the brain in rats. *Acta Neuropathol.*
- Jones, J.F.X., Wang, Y., and Jordan, D. (1998). Activity of C fibre cardiac vagal efferents in anaesthetized cats and rats. *J. Physiol.* 507, 869–880.
- Kim, S., Kwon, S.-H., Kam, T.-I., Panicker, N., Karuppagounder, S.S., Lee, S., Lee, J.H., Kim, W.R., Kook, M., Foss, C.A., et al. (2019). Transneuronal Propagation of Pathologic  $\alpha$ -Synuclein from the Gut to the Brain Models Parkinson's Disease. *Neuron* 103, 627–641.
- Knudsen, K., Szwebs, M., Hansen, A.K., and Borghammer, P. (2018). Gastric emptying in Parkinson's disease – A mini-review. *Park. Relat. Disord.* 55, 18–25.
- Lang, A.E., and Espay, A.J. (2018). Disease Modification in Parkinson's Disease: Current Approaches, Challenges, and Future Considerations. *Mov. Disord.* 33, 660–677.
- Lasser-Katz, E., Simchovitz, A., Chiu, W.-H., Oertel, W.H., Sharon, R., Soreq, H., Roeper, J., and Goldberg, J.A. (2017). Mutant  $\alpha$ -Synuclein Overexpression Induces Stressless Pacemaking in Vagal Motoneurons at Risk in Parkinson's Disease. *J. Neurosci.* 37, 47–57.
- Lecat, M., Decavel, P., Magnin, E., Lucas, B., Gremeaux, V., and Sagawa, Y. (2017). Multiple Sclerosis and Clinical Gait Analysis before and after Fampridine: A Systematic Review. *Eur. Neurol.* 78, 272–286.
- Lim, S.-Y., Fox, S.H., and Lang, A.E. (2009). Overview of the extranigral aspects of Parkinson disease. *Arch. Neurol.* 66, 167–172.
- Luca, C.C., Nadayil, G., Dong, C., Nahab, F.B., Field-Fote, E., and Singer, C. (2017). Dalfampridine in Parkinson's disease related gait dysfunction: A randomized double blind trial. *J. Neurol. Sci.* 15, 7–11.
- Luk, K.C., Kehm, V., Carroll, J., Zhang, B., O'Brien, P., Trojanowski, J.Q., and Lee, V.M.Y. (2012). Pathological  $\alpha$ -synuclein transmission initiates Parkinson-like neurodegeneration in nontransgenic mice. *Science* (80-. ). 338, 949–953.
- Mahlknecht, P., Pechlaner, R., Boesveldt, S., Volc, D., Pinter, B., Reiter, E., Müller, C., Krismer, F., Berendse, H.W., van Hilten, J.J., et al. (2016). Optimizing odor identification testing as quick and accurate diagnostic tool for Parkinson's disease. *Mov. Disord.* 31, 1408–1413.
- Musgrove, R.E., Helwig, M., Bae, E.J., Aboutaleb, H., Lee, S.J., Ulusoy, A., and Di Monte, D.A. (2019). Oxidative stress in vagal neurons promotes parkinsonian pathology and intercellular  $\alpha$ -synuclein transfer. *J. Clin. Invest.* 130, 3738–3753.

- Nosaka, S., Yasunaga, K., and Tamai, S. (1982). Vagal cardiac preganglionic neurons: Distribution, cell types, and reflex discharges. *Am. J. Physiol. - Regul. Integr. Comp. Physiol.* 243, R92-98.
- Oh, S.J., Shcherbakova, N., Kostera-Pruszczyk, A., Alsharabati, M., Dimachkie, M., Blanco, J.M., Brannagan, T., Lavrnić, D., Shieh, P.B., Vial, C., et al. (2016). Amifampridine phosphate (Firdapse®) is effective and safe in a phase 3 clinical trial in LEMS. *Muscle and Nerve* 53, 717–725.
- De Pablo-Fernández, E., Passananti, V., Zárate-López, N., Emmanuel, A., and Warner, T. (2019). Colonic transit, high-resolution anorectal manometry and MRI defecography study of constipation in Parkinson's disease. *Parkinsonism Relat. Disord.* 66, 195–201.
- Perrins, R. (1999). Biophysics of Computation: Information Processing in Single Neurons. *Q. Rev. Biol.* 74, 494–494.
- Pinault, D. (1996). A novel single-cell staining procedure performed in vivo under electrophysiological control: Morpho-functional features of juxtacellularly labeled thalamic cells and other central neurons with biocytin or Neurobiotin. *J. Neurosci. Methods* 65, 113–136.
- Polymeropoulos, M.H., Lavedan, C., Leroy, E., Ide, S.E., Dehejia, A., Dutra, A., Pike, B., Root, H., Rubenstein, J., Boyer, R., et al. (1997). Mutation in the alpha-synuclein gene identified in families with Parkinson's disease. *Science* 276, 2045–2047.
- Postuma, R.B., and Berg, D. (2019). Prodromal Parkinson's Disease: The Decade Past, the Decade to Come. *Mov. Disord.* 34, 665–675.
- Rey, N.L., George, S., Steiner, J.A., Madaj, Z., Luk, K.C., Trojanowski, J.Q., Lee, V.M.Y., and Brundin, P. (2018). Spread of aggregates after olfactory bulb injection of  $\alpha$ -synuclein fibrils is associated with early neuronal loss and is reduced long term. *Acta Neuropathol.* 135, 65–83.
- Rusconi, R., Ulusoy, A., Aboutaleb, H., and Di Monte, D.A. (2018). Long-lasting pathological consequences of overexpression-induced  $\alpha$ -synuclein spreading in the rat brain. *Aging Cell* 17, e12727.
- Schiemann, J., Schlaudraff, F., Klose, V., Bingmer, M., Seino, S., Magill, P.J., Zaghoul, K.A., Schneider, G., Liss, B., and Roeper, J. (2012). K-ATP channels in dopamine substantia nigra neurons control bursting and novelty-induced exploration. *Nat. Neurosci.* 15, 1272–1280.
- Selkoe, D.J. (2019). Alzheimer disease and aducanumab: adjusting our approach. *Nat. Rev. Neurol.* 15, 365–366.
- Simón-Sánchez, J., Schulte, C., Bras, J.M., Sharma, M., Gibbs, J.R., Berg, D., Paisan-Ruiz, C., Lichtner, P., Scholz, S.W., Hernandez, D.G., et al. (2009). Genome-wide association study reveals genetic risk underlying Parkinson's disease. *Nat. Genet.* 41, 1308–1312.
- Spillantini, M.G., Crowther, R.A., Jakes, R., Hasegawa, M., and Goedert, M. (1998).  $\alpha$ -Synuclein in filamentous inclusions of Lewy bodies from Parkinson's disease and dementia with Lewy bodies. *Proc. Natl. Acad. Sci. U. S. A.* 95, 6469–6473.
- Subramaniam, M., Althof, D., Gispert, S., Schwenk, J., Auburger, G., Kulik, A., Fakler, B., and Roeper, J. (2014). Mutant  $\alpha$ -synuclein enhances firing frequencies in dopamine substantia nigra neurons by oxidative impairment of A-type potassium channels. *J. Neurosci.* 34, 13586–13599.

- Surmeier, D.J., Obeso, J.A., and Halliday, G.M. (2017). Selective neuronal vulnerability in Parkinson disease. *Nat. Rev. Neurosci.* 18, 101–113.
- Thakur, P., Chiu, W.H., Roeper, J., and Goldberg, J.A. (2019).  $\alpha$ -Synuclein 2.0 — Moving towards Cell Type Specific Pathophysiology. *Neuroscience* 412, 248–256.
- Ulusoy, A., Rusconi, R., Pérez-Revuelta, B.I., Musgrove, R.E., Helwig, M., Winzen-Reichert, B., and Di Monte, D.A. (2013). Caudo-rostral brain spreading of  $\alpha$ -synuclein through vagal connections. *EMBO Mol. Med.* 5, 1051–1059.
- Ulusoy, A., Musgrove, R.E., Rusconi, R., Klinkenberg, M., Helwig, M., Schneider, A., and Di Monte, D.A. (2015). Neuron-to-neuron  $\alpha$ -synuclein propagation in vivo is independent of neuronal injury. *Acta Neuropathol. Commun.* 3.
- Ulusoy, A., Phillips, R.J., Helwig, M., Klinkenberg, M., Powley, T.L., and Di Monte, D.A. (2017). Brain-to-stomach transfer of  $\alpha$ -synuclein via vagal preganglionic projections. *Acta Neuropathol.* 133, 381–393.
- Valappil, R.A., Black, J.E., Broderick, M.J., Carrillo, O., Frenette, E., Sullivan, S.S., Goldman, S.M., Tanner, C.M., and Langston, J.W. (2010). Exploring the electrocardiogram as a potential tool to screen for premotor Parkinson’s disease. *Mov. Disord.* 25, 2296–2303.
- Wakabayashi, K., Takahashi, H., Takeda, S., Ohama, E., and Ikuta, F. (1988). Parkinson’s disease: the presence of Lewy bodies in Auerbach’s and Meissner’s plexuses. *Acta Neuropathol.* 76, 217–221.
- Yarom, Y., Sugimori, M., and Llinas, R. (1985). Ionic currents and firing patterns of mammalian vagal motoneurons in vitro. *Neuroscience* 16, 719–737.
- Zhang, X., Fogel, R., and Renahan, W.E. (1992). Physiology and morphology of neurons in the dorsal motor nucleus of the vagus and the nucleus of the solitary tract that are sensitive to distension of the small intestine. *J. Comp. Neurol.* 323, 432–448.
